# Supplementary material for: Measurement of Fitness and Predatory Ability of 4 Predatory Mite Species on Tibetan Plateau
Source: Preprints.org preprint supplement (doi:10.20944/preprints202312.0946.v1), 2023-12-13
Supplement: Supplementary file 2 [file supplementary]

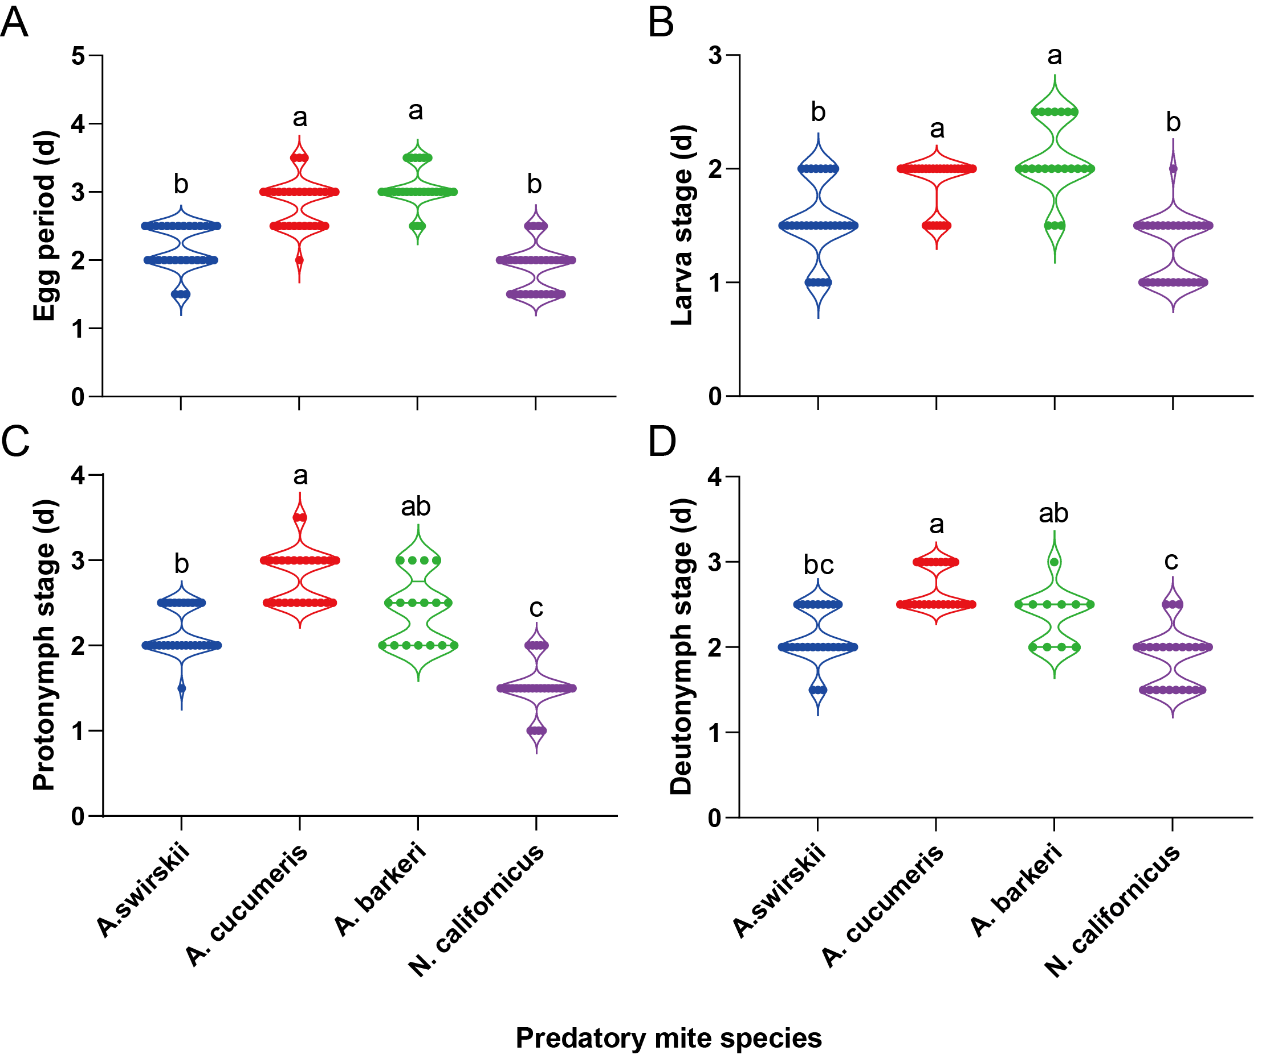


**Fig. S1.** Developmental time of different growth stages of four predatory mite species in Tibetan Plateau, the egg period (A), larva stage (B), pretonymph stage (C) and deutonymph stage (D) were listed, respectively. The same letters above columns represent homogeneous groups in post-hoc tests (*P* > 0.05) following an ANOVA.
